# Supplementary material for: A novel pancreatic cancer model originated from transformation of acinar cells in adult tree shrew, a primate-like animal
Source: PubMed Central journal article supplement (PMC6505477; doi:10.1242/dmm.038703), 2019-04-15
Supplement: dmm-12-038703-s1.pdf [file dmm-12-038703-s1.pdf]

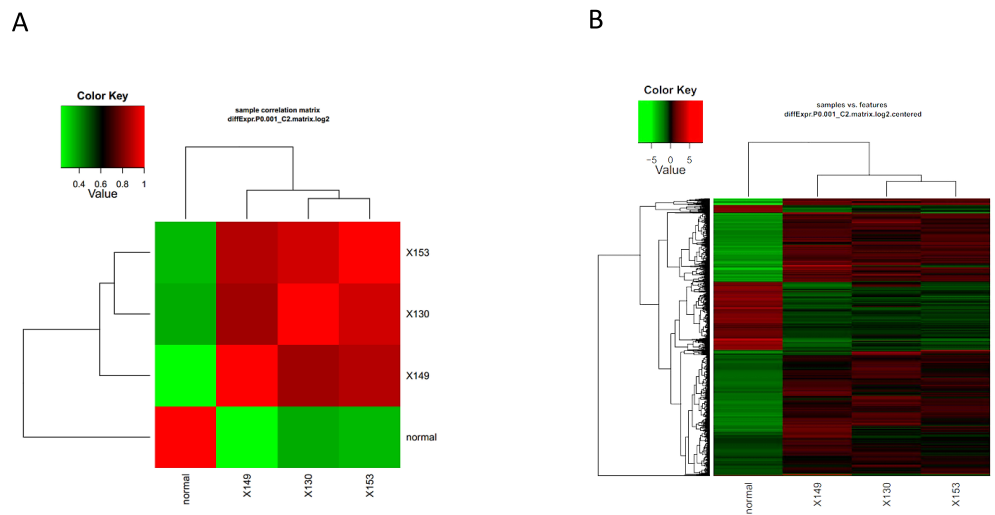

**Figure S1.** Analysis of RNA-seq of tree shrew pancreatic cancer. (A) sample correlation of three tumor samples and normal tissue. (B) differentially expressed genes between tumor samples and normal tissue.

**Table S1.** The quality of RNA-seq of tree shrew samples.

[Click here to Download Table S1](#)

**Table S2.** Homology between human, tree shrew, and mouse pancreatic cancer pathway genes and their modification sites.

[Click here to Download Table S2](#)

**Table S3.** The relative expression of human-Tree shrew-mouse 1:1:1 ortholog genes.

[Click here to Download Table S3](#)
